# Supplementary material for: Exploring the ability of LSTM-based hydrological models to simulate streamflow time series for flood frequency analysis
Source: Copernicus journal article supplement (doi:10.5194/hess-29-4951-2025), 2025-10-06
Supplement: Supplementary file 1 [file hess-29-4951-2025-supplement.pdf]

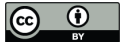

*Supplement of*

## **Exploring the ability of LSTM-based hydrological models to simulate streamflow time series for flood frequency analysis**

**Jean-Luc Martel et al.**

*Correspondence to:* Jean-Luc Martel ([jean-luc.martel@etsmtl.ca](mailto:jean-luc.martel@etsmtl.ca))

The copyright of individual parts of the supplement might differ from the article licence.

**Table S1: Summary statistics of catchment descriptors used as inputs to the LSTM models in this study.**

| Descriptor                             | Summary                                                                                                                                 | Minimum | Median | Maximum |
|----------------------------------------|-----------------------------------------------------------------------------------------------------------------------------------------|---------|--------|---------|
| <b>Geographic descriptors</b>          |                                                                                                                                         |         |        |         |
| Area [km <sup>2</sup> ]                | Drainage area at the outlet                                                                                                             | 44      | 980    | 21338   |
| Slope [m/m]                            | Average slope of the catchment                                                                                                          | 0.57    | 4.23   | 11.35   |
| Elevation [m]                          | Average elevation of the catchment                                                                                                      | 91      | 387    | 864     |
| Aspect [°]                             | Average orientation of the catchment <sup>1</sup>                                                                                       | 14.3    | 190    | 359     |
| Gravelius index [-]                    | Index representing the compactness of the catchment, with 1 representing a perfect circle and stretched catchments having larger values | 1.36    | 2.14   | 3.68    |
| Perimeter [km]                         | Length of the perimeter of the catchment                                                                                                | 32      | 226    | 1779    |
| Centroid latitude [°N]                 | Latitude coordinate of the centroid of the catchment                                                                                    | 44.89   | 47.52  | 52.34   |
| Centroid longitude [°W]                | Longitude coordinate of the centroid of the catchment                                                                                   | -78.56  | -71.52 | -58.10  |
| <b>Land-use descriptors</b>            |                                                                                                                                         |         |        |         |
| Crops [%]                              | Fraction of the surface covered by crops                                                                                                | 0.0     | 1.3    | 53.9    |
| Forests [%]                            | Fraction of the surface covered by forests                                                                                              | 31.6    | 84.2   | 95.8    |
| Grass [%]                              | Fraction of the surface covered by grass                                                                                                | 0.1     | 1.0    | 7.6     |
| Shrubs [%]                             | Fraction of the surface covered by shrubs                                                                                               | 0.0     | 1.0    | 14.7    |
| Water [%]                              | Fraction of the surface covered by water                                                                                                | 0.0     | 3.9    | 12.7    |
| Wetlands [%]                           | Fraction of the surface covered by wetlands                                                                                             | 0.0     | 0.5    | 16.5    |
| Urban [%]                              | Fraction of the surface covered by urban areas                                                                                          | 0       | 1.2    | 11.2    |
| <b>Hydrometeorological descriptors</b> |                                                                                                                                         |         |        |         |
| Mean pr [mm/d]                         | Average daily precipitation                                                                                                             | 2.6     | 3.3    | 4.0     |
| Mean PET [mm/d]                        | Average daily potential evapotranspiration                                                                                              | 1.0     | 1.4    | 1.8     |
| Mean SWE [mm/d]                        | Average daily snow water equivalent                                                                                                     | 0.009   | 0.037  | 0.094   |
| Aridity index [-]                      | Ratio of precipitation to evapotranspiration                                                                                            | 0.32    | 0.43   | 0.55    |
| Snow fraction [%]                      | Fraction of precipitation falling as snow on average                                                                                    | 17.7    | 28.1   | 40.7    |
| High pr frequency [d/y]                | Frequency of days having more than 5x the mean daily precipitation                                                                      | 2.9     | 4.2    | 5.2     |
| High pr duration [d]                   | Average duration of consecutive high precipitation days                                                                                 | 1.07    | 1.09   | 1.13    |
| Low pr frequency [d/y]                 | Frequency of days with < 1 mm of daily precipitation                                                                                    | 46.0    | 54.0   | 61.3    |
| Low pr duration [d]                    | Average duration of consecutive low precipitation days                                                                                  | 2.35    | 2.71   | 3.04    |

<sup>1</sup> Note that the aspect is a direction and thus 0 and 360 are equivalent.

**Table S2: List of HYDROTEL recalibrated parameters**

| <b>ID</b> | <b>Parameter</b>                                     |
|-----------|------------------------------------------------------|
| 1         | Depth of the first soil layer                        |
| 2         | Depth of the second soil layer                       |
| 3         | Recession coefficient                                |
| 4         | Melting temperature threshold in a coniferous forest |
| 5         | Melting temperature threshold in a deciduous forest  |
| 6         | Melting temperature threshold in an open area        |
| 7         | Maximum melt rate in a coniferous forest             |
| 8         | Maximum melt rate in a deciduous forest              |
| 9         | Maximum melt rate in an open area                    |
| 10        | PET multiplicative coefficient                       |
| 11        | Threshold temperature for rain to snow               |

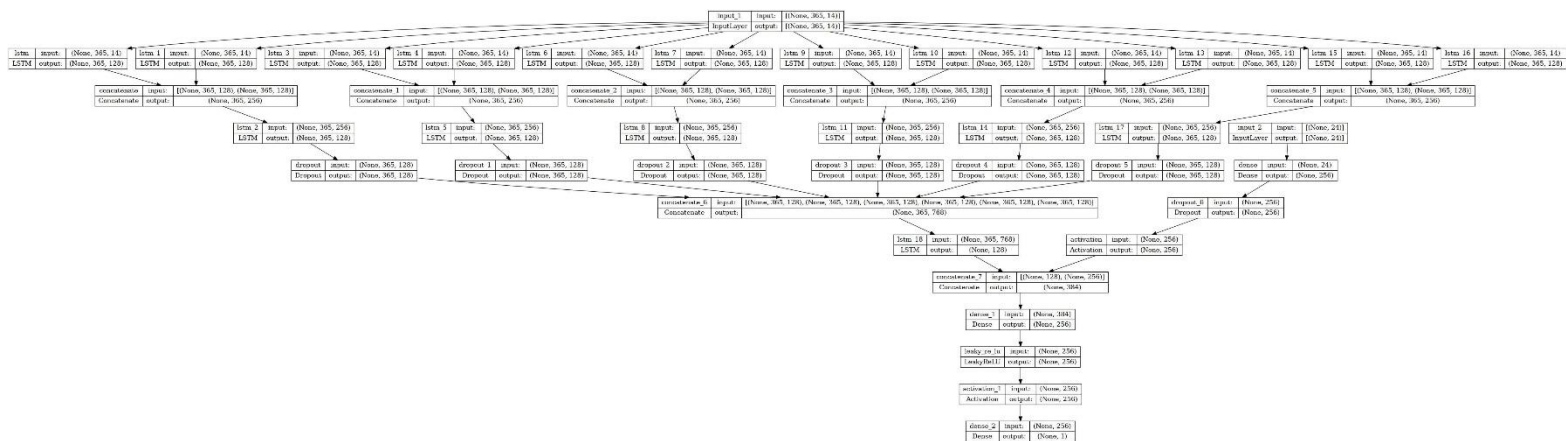

**Figure S1: General LSTM-based model structure developed and implemented, referred to as LSTM-Base in this study.**

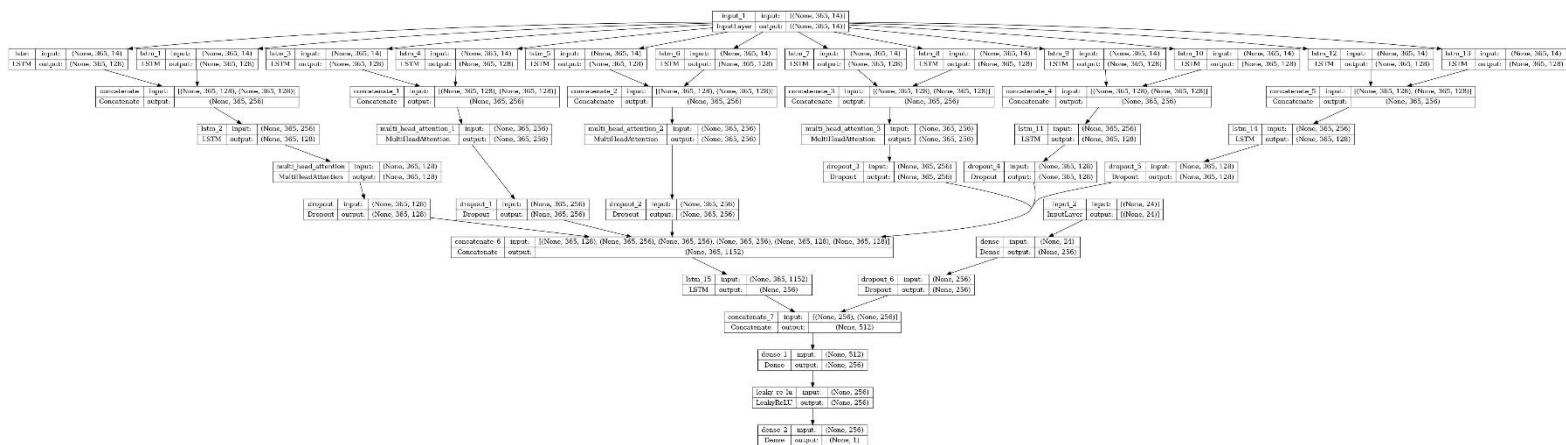

**Figure S2: Same as Figure S1 but including the multihead attention.**

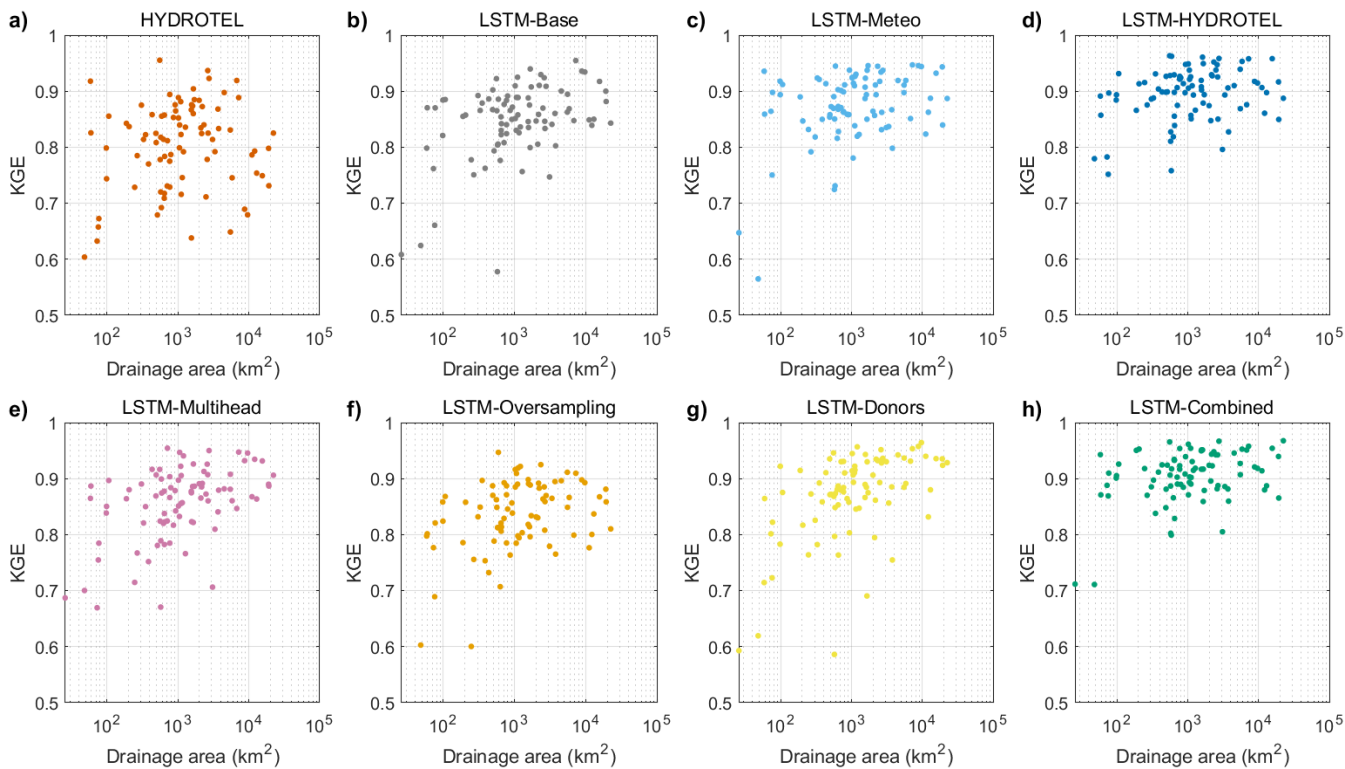

**Figure S3: KGE scores for each of the 8 models on the 88 catchments as a function of the catchment drainage area.**

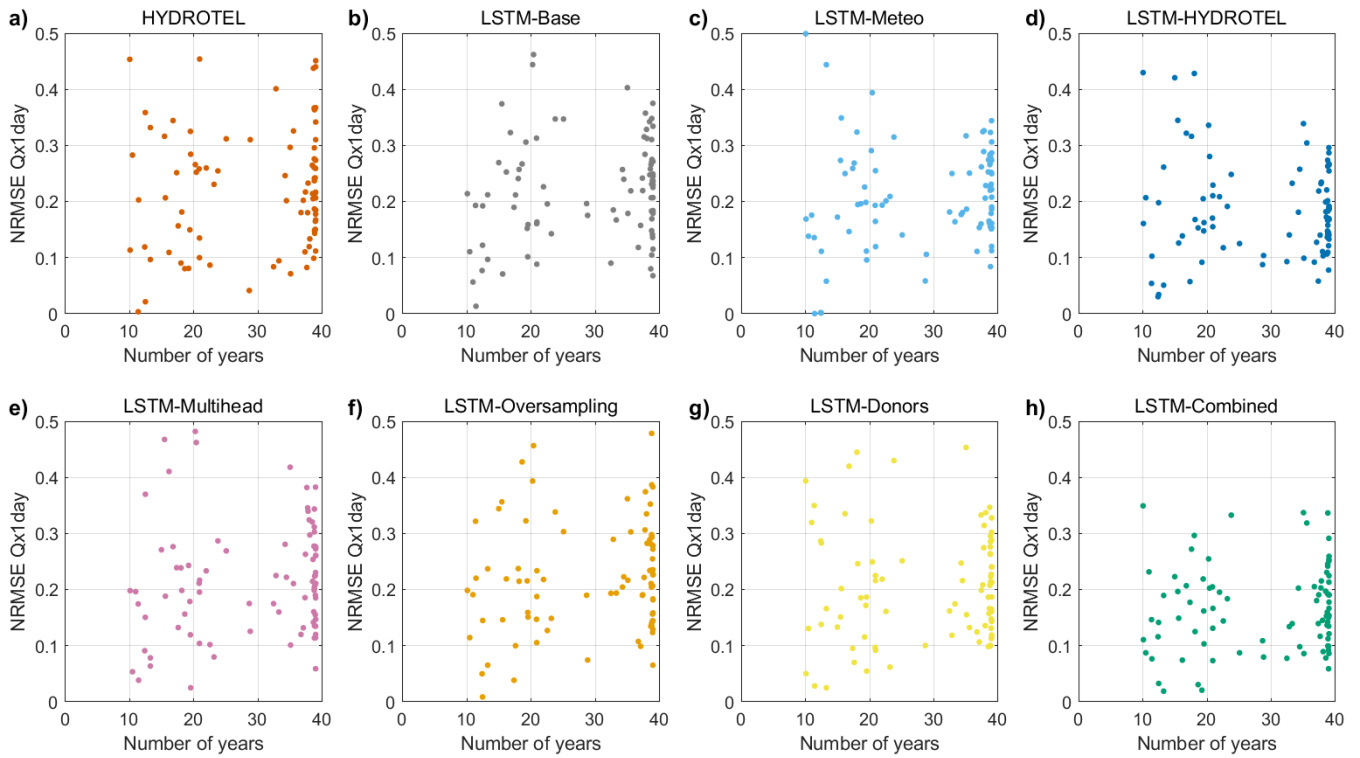

**Figure S4: NRMSE of Qx1day scores for each of the 8 models on the 88 catchments as a function of the number of years.**

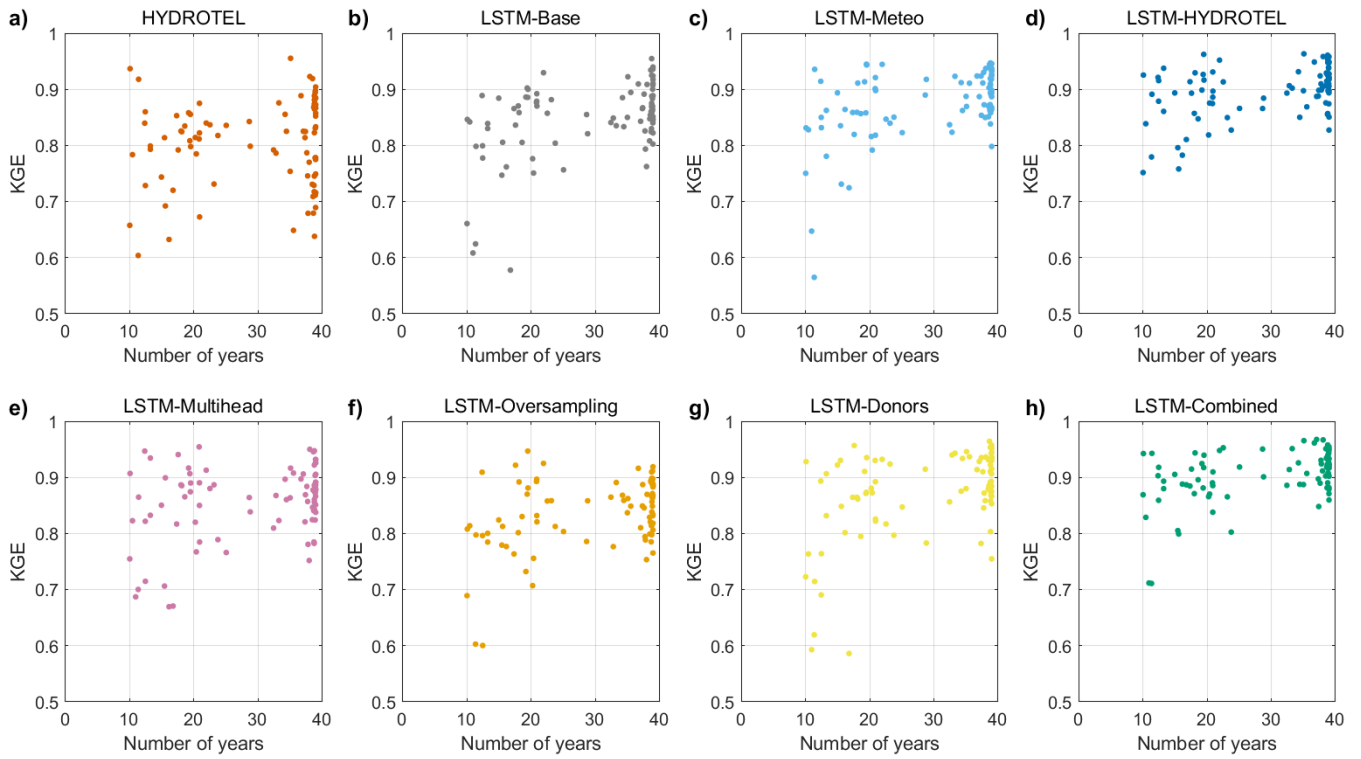

**Figure S5: KGE scores for each of the 8 models on the 88 catchments as a function of the number of years.**
